# Supplementary material for: Evaluation of the association between maternal folic acid supplementation and the risk of congenital heart disease: a systematic review and meta-analysis
Source: PubMed Central journal article supplement (PMC8962131; doi:10.1186/s12937-022-00772-2), 2022-03-26

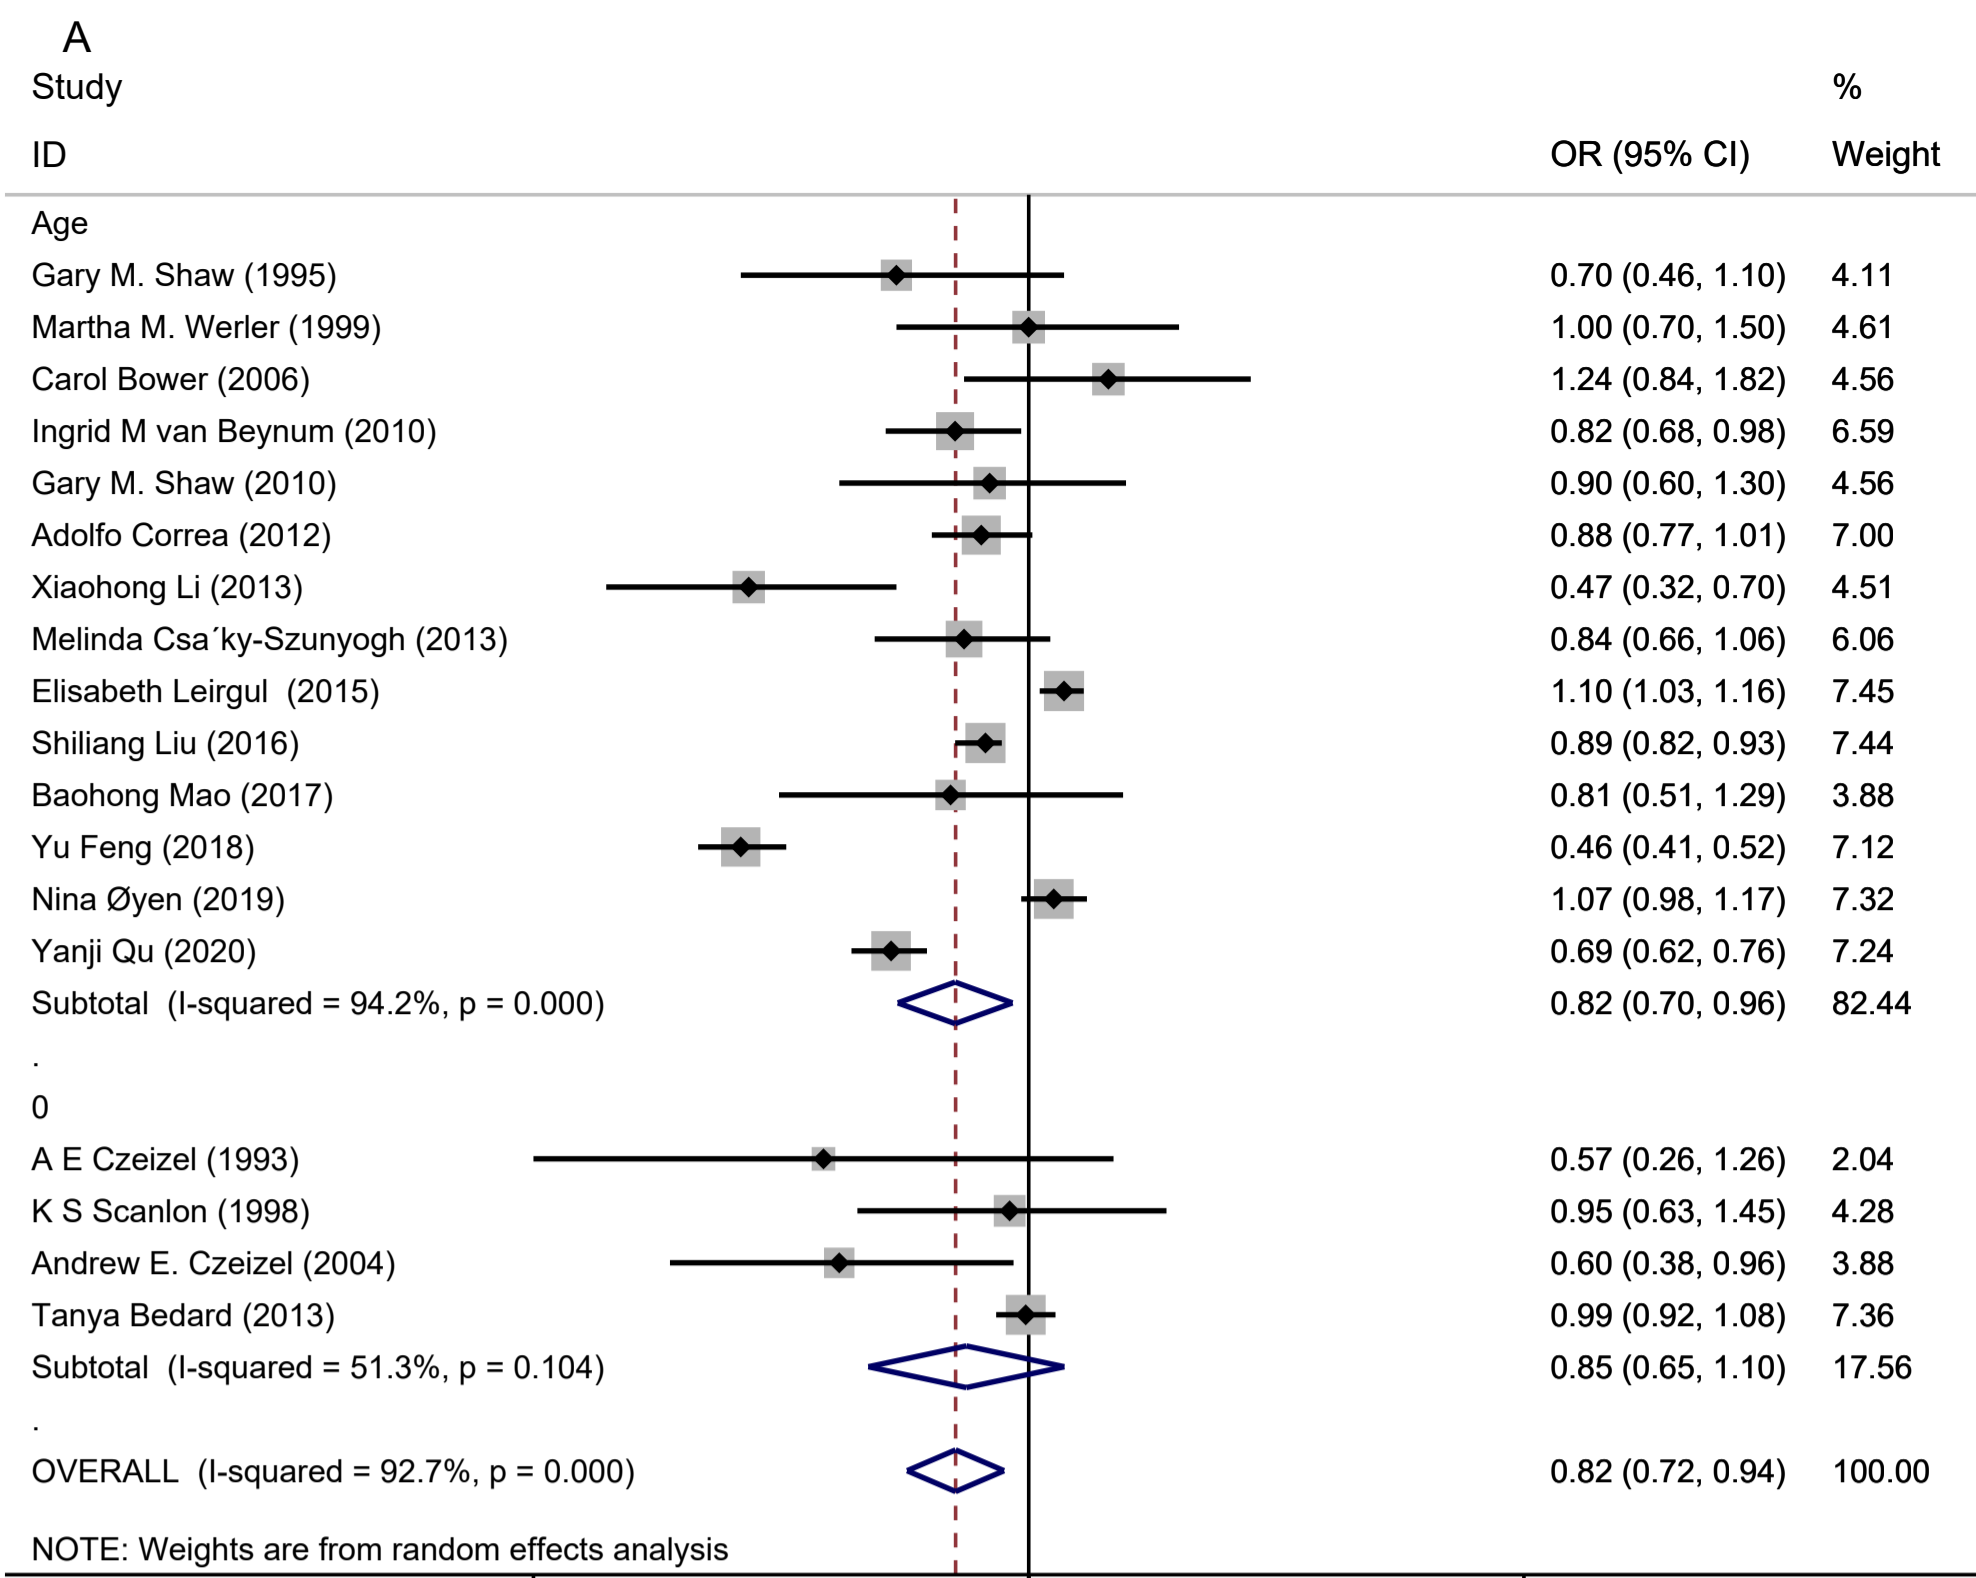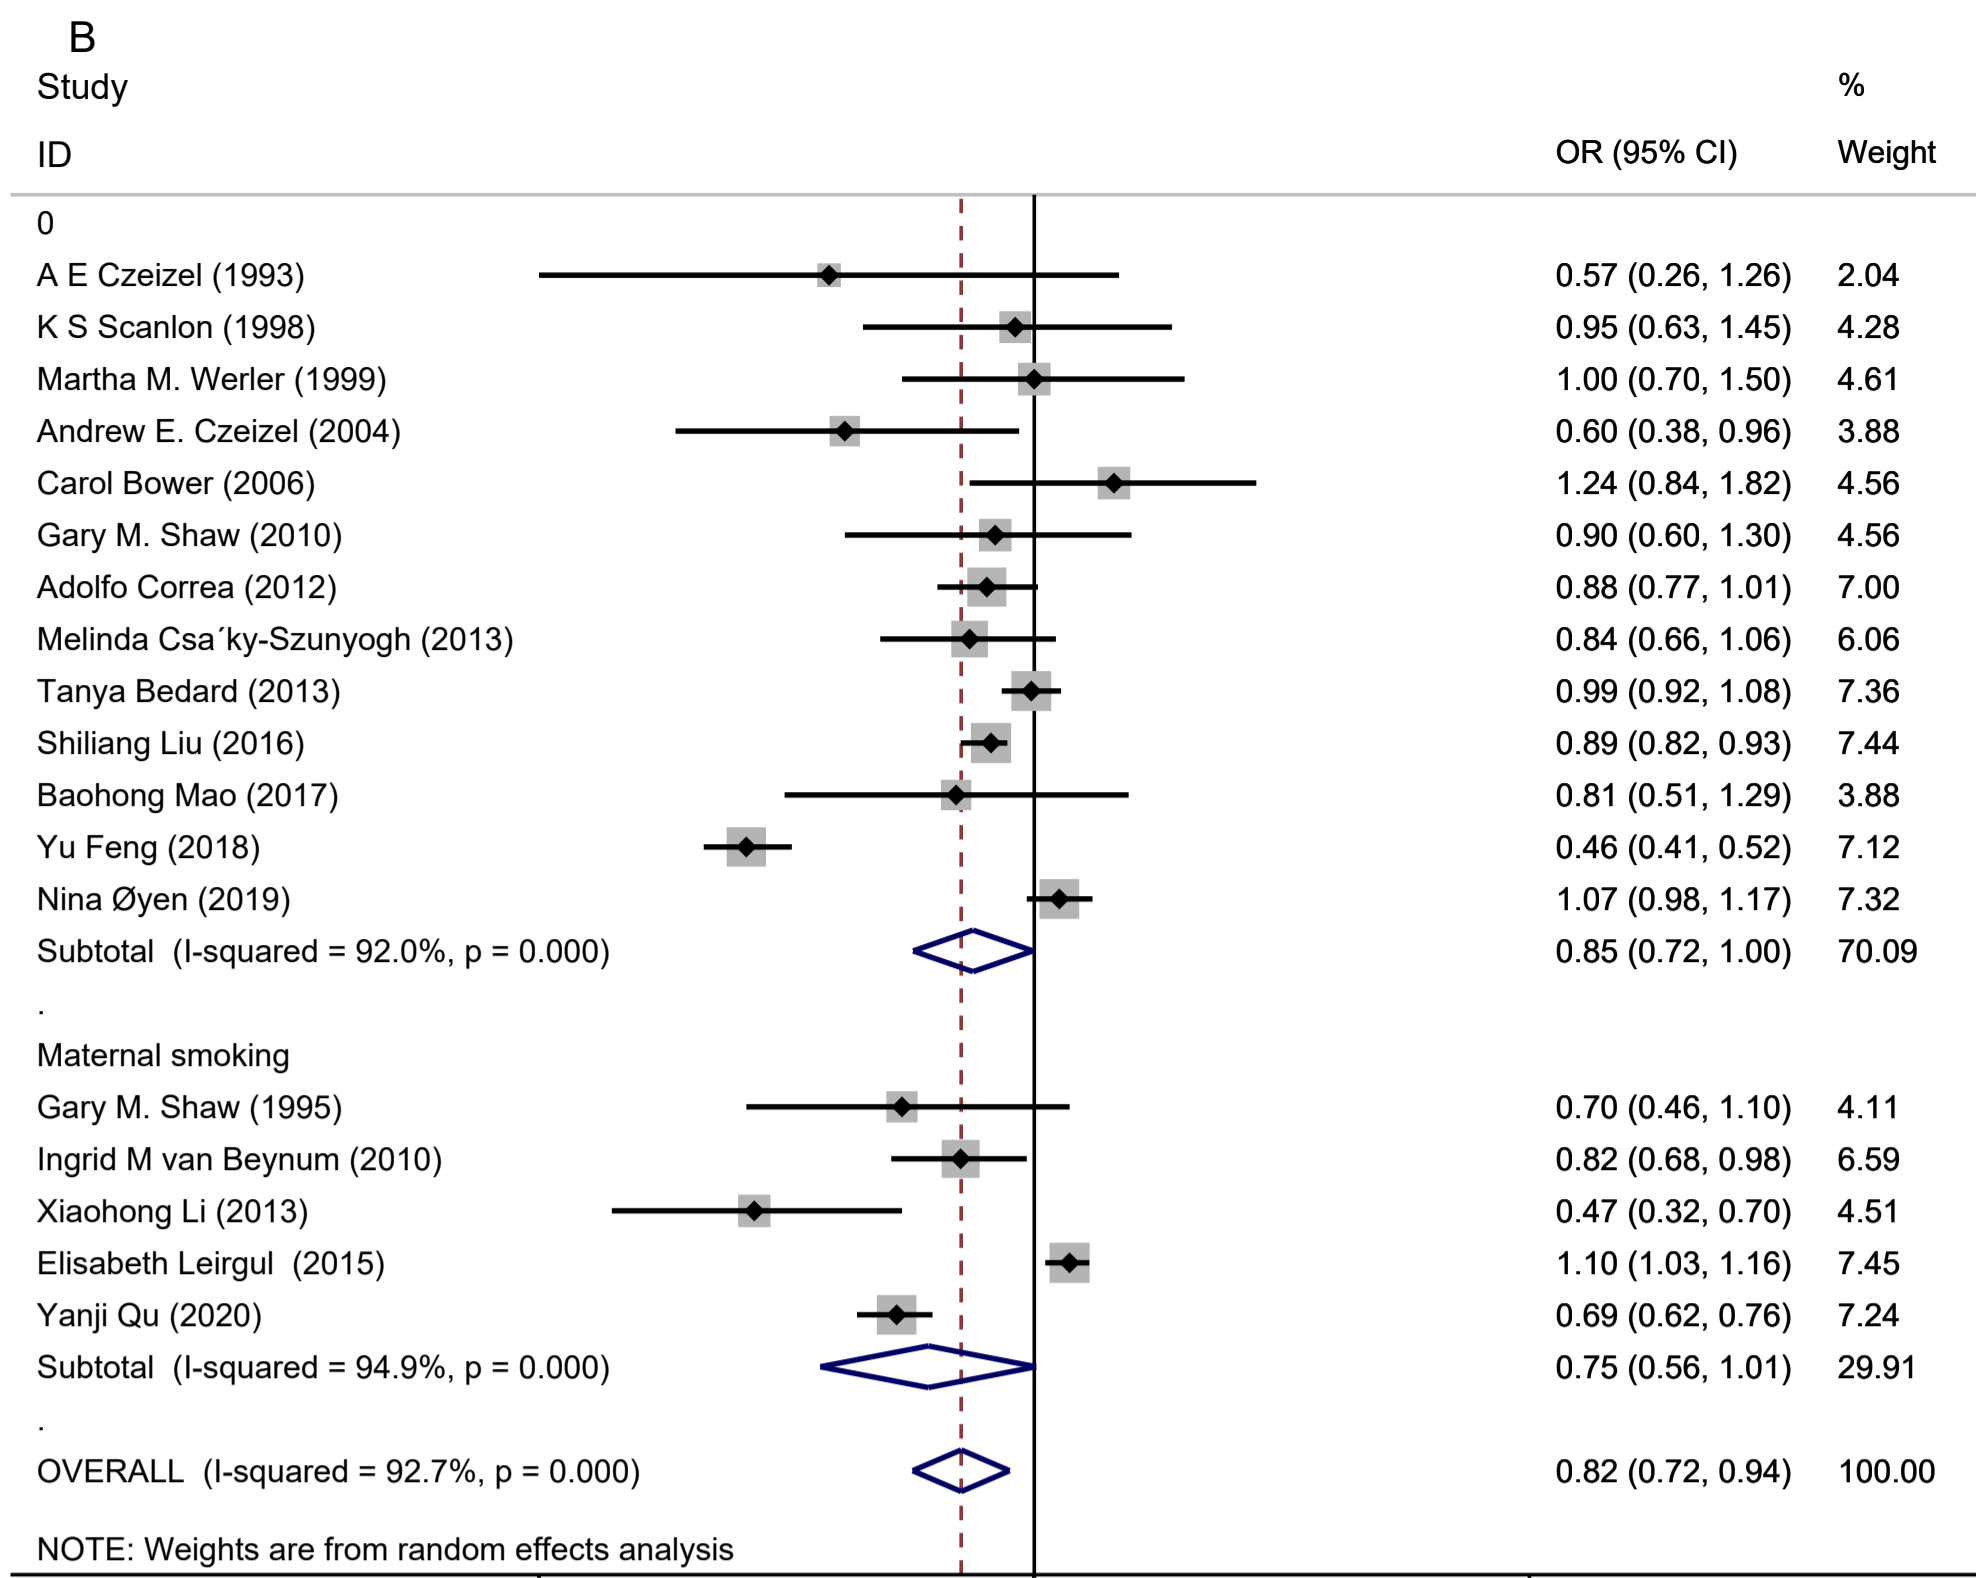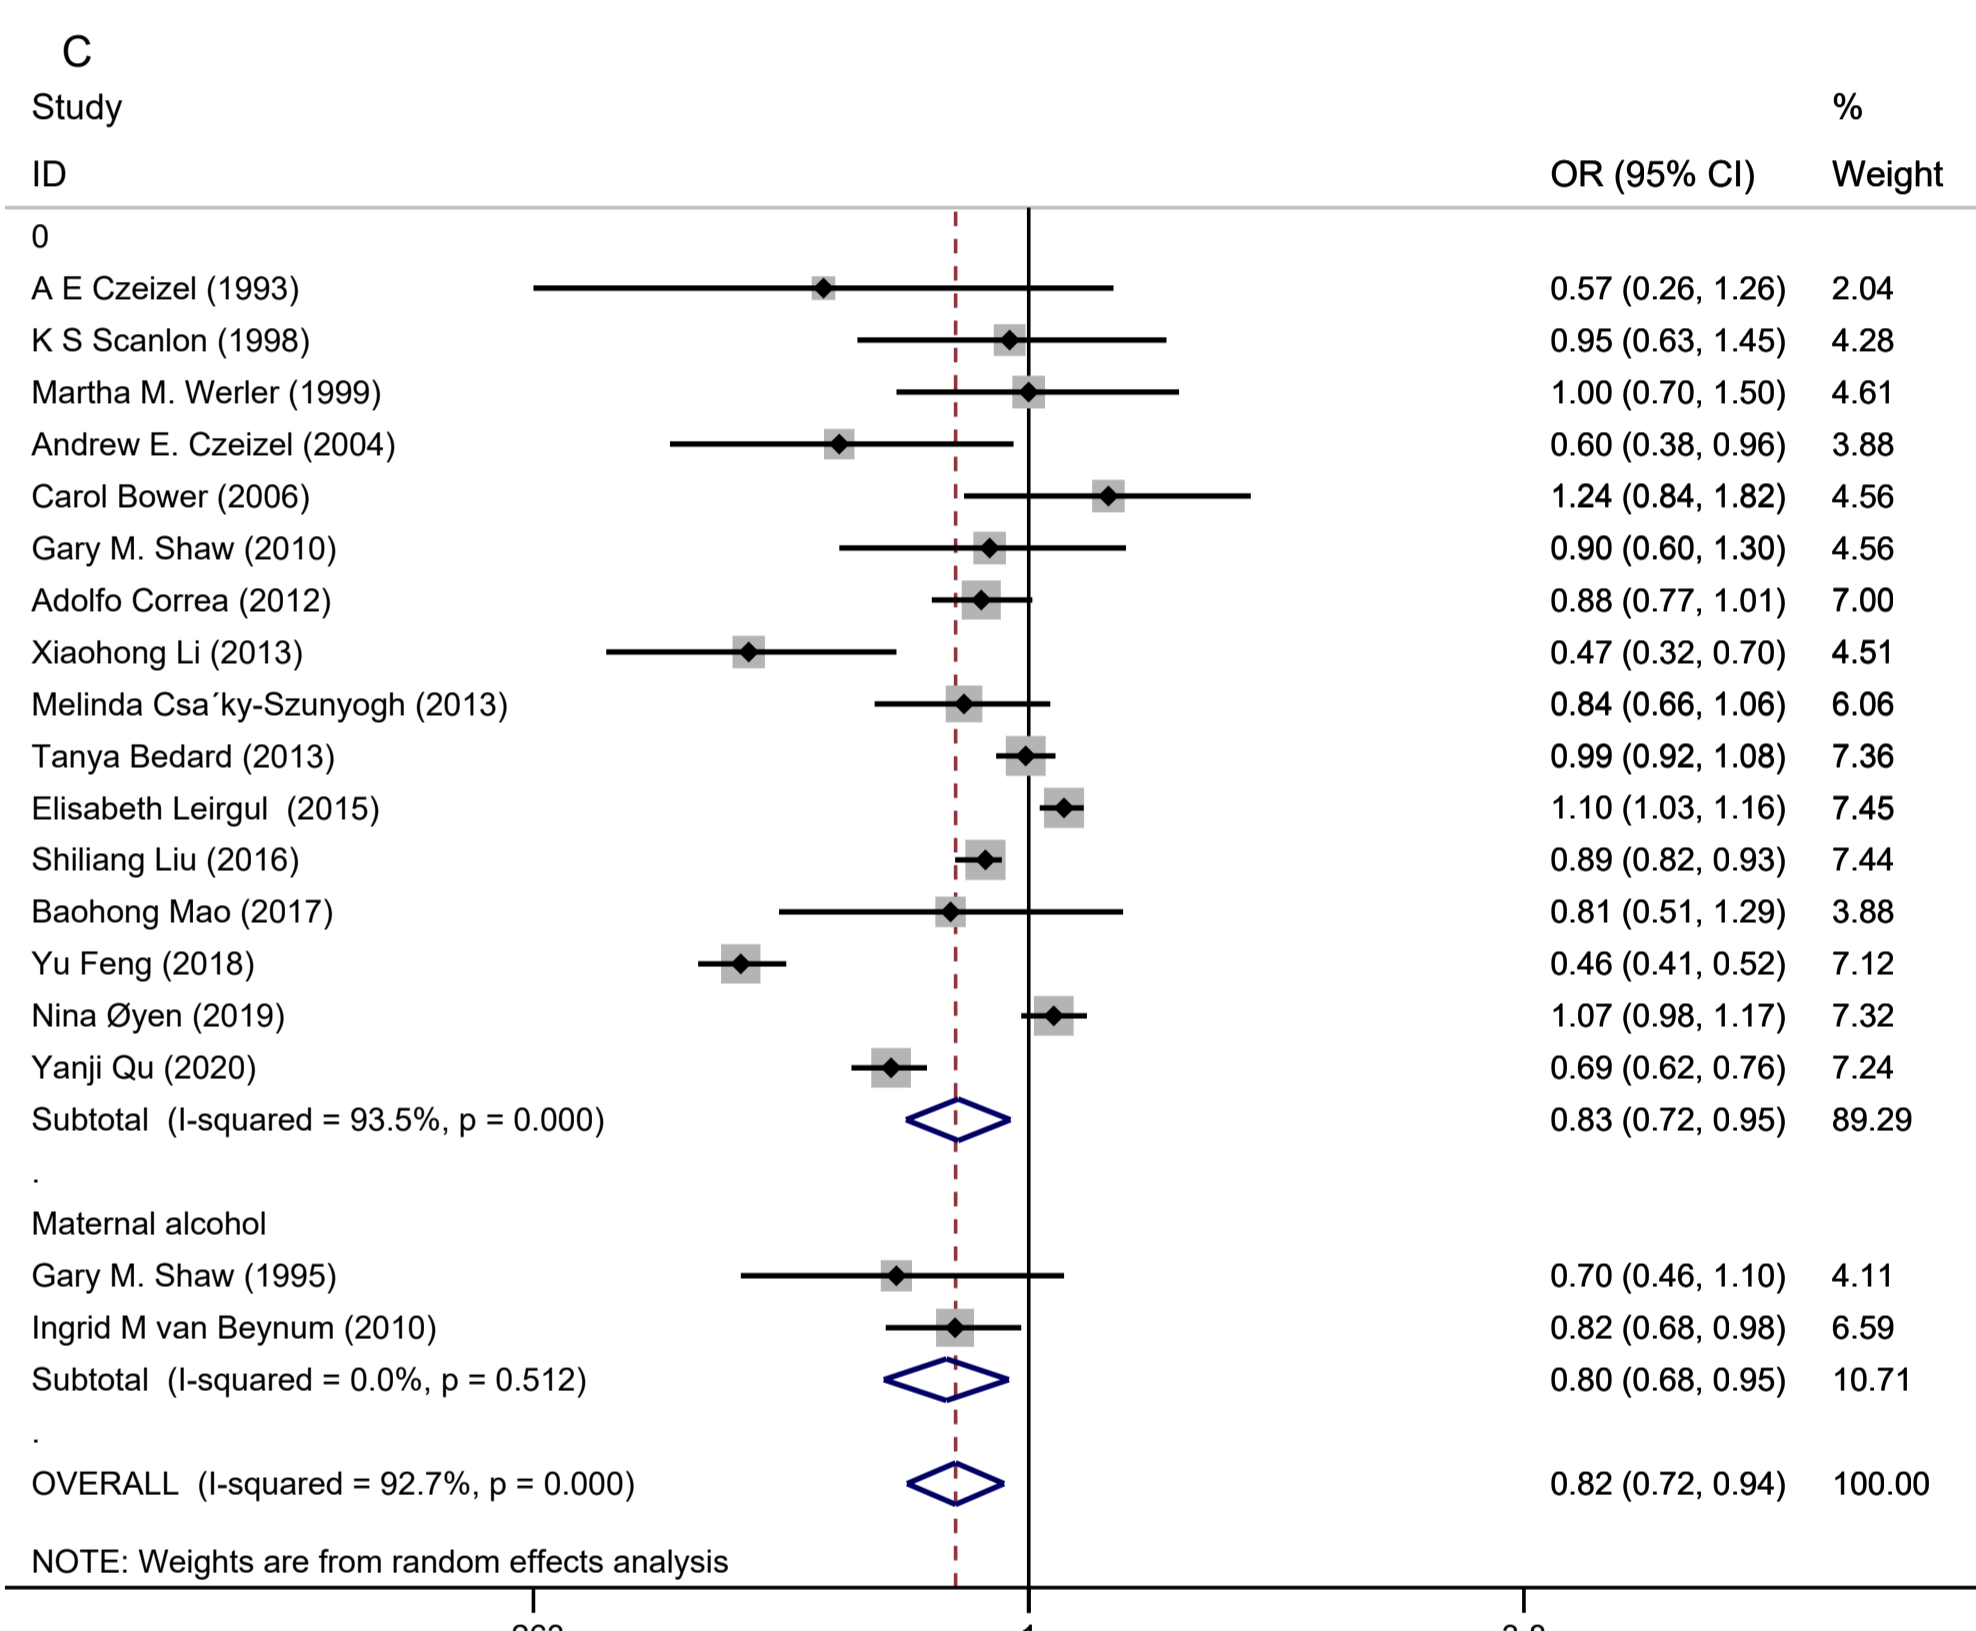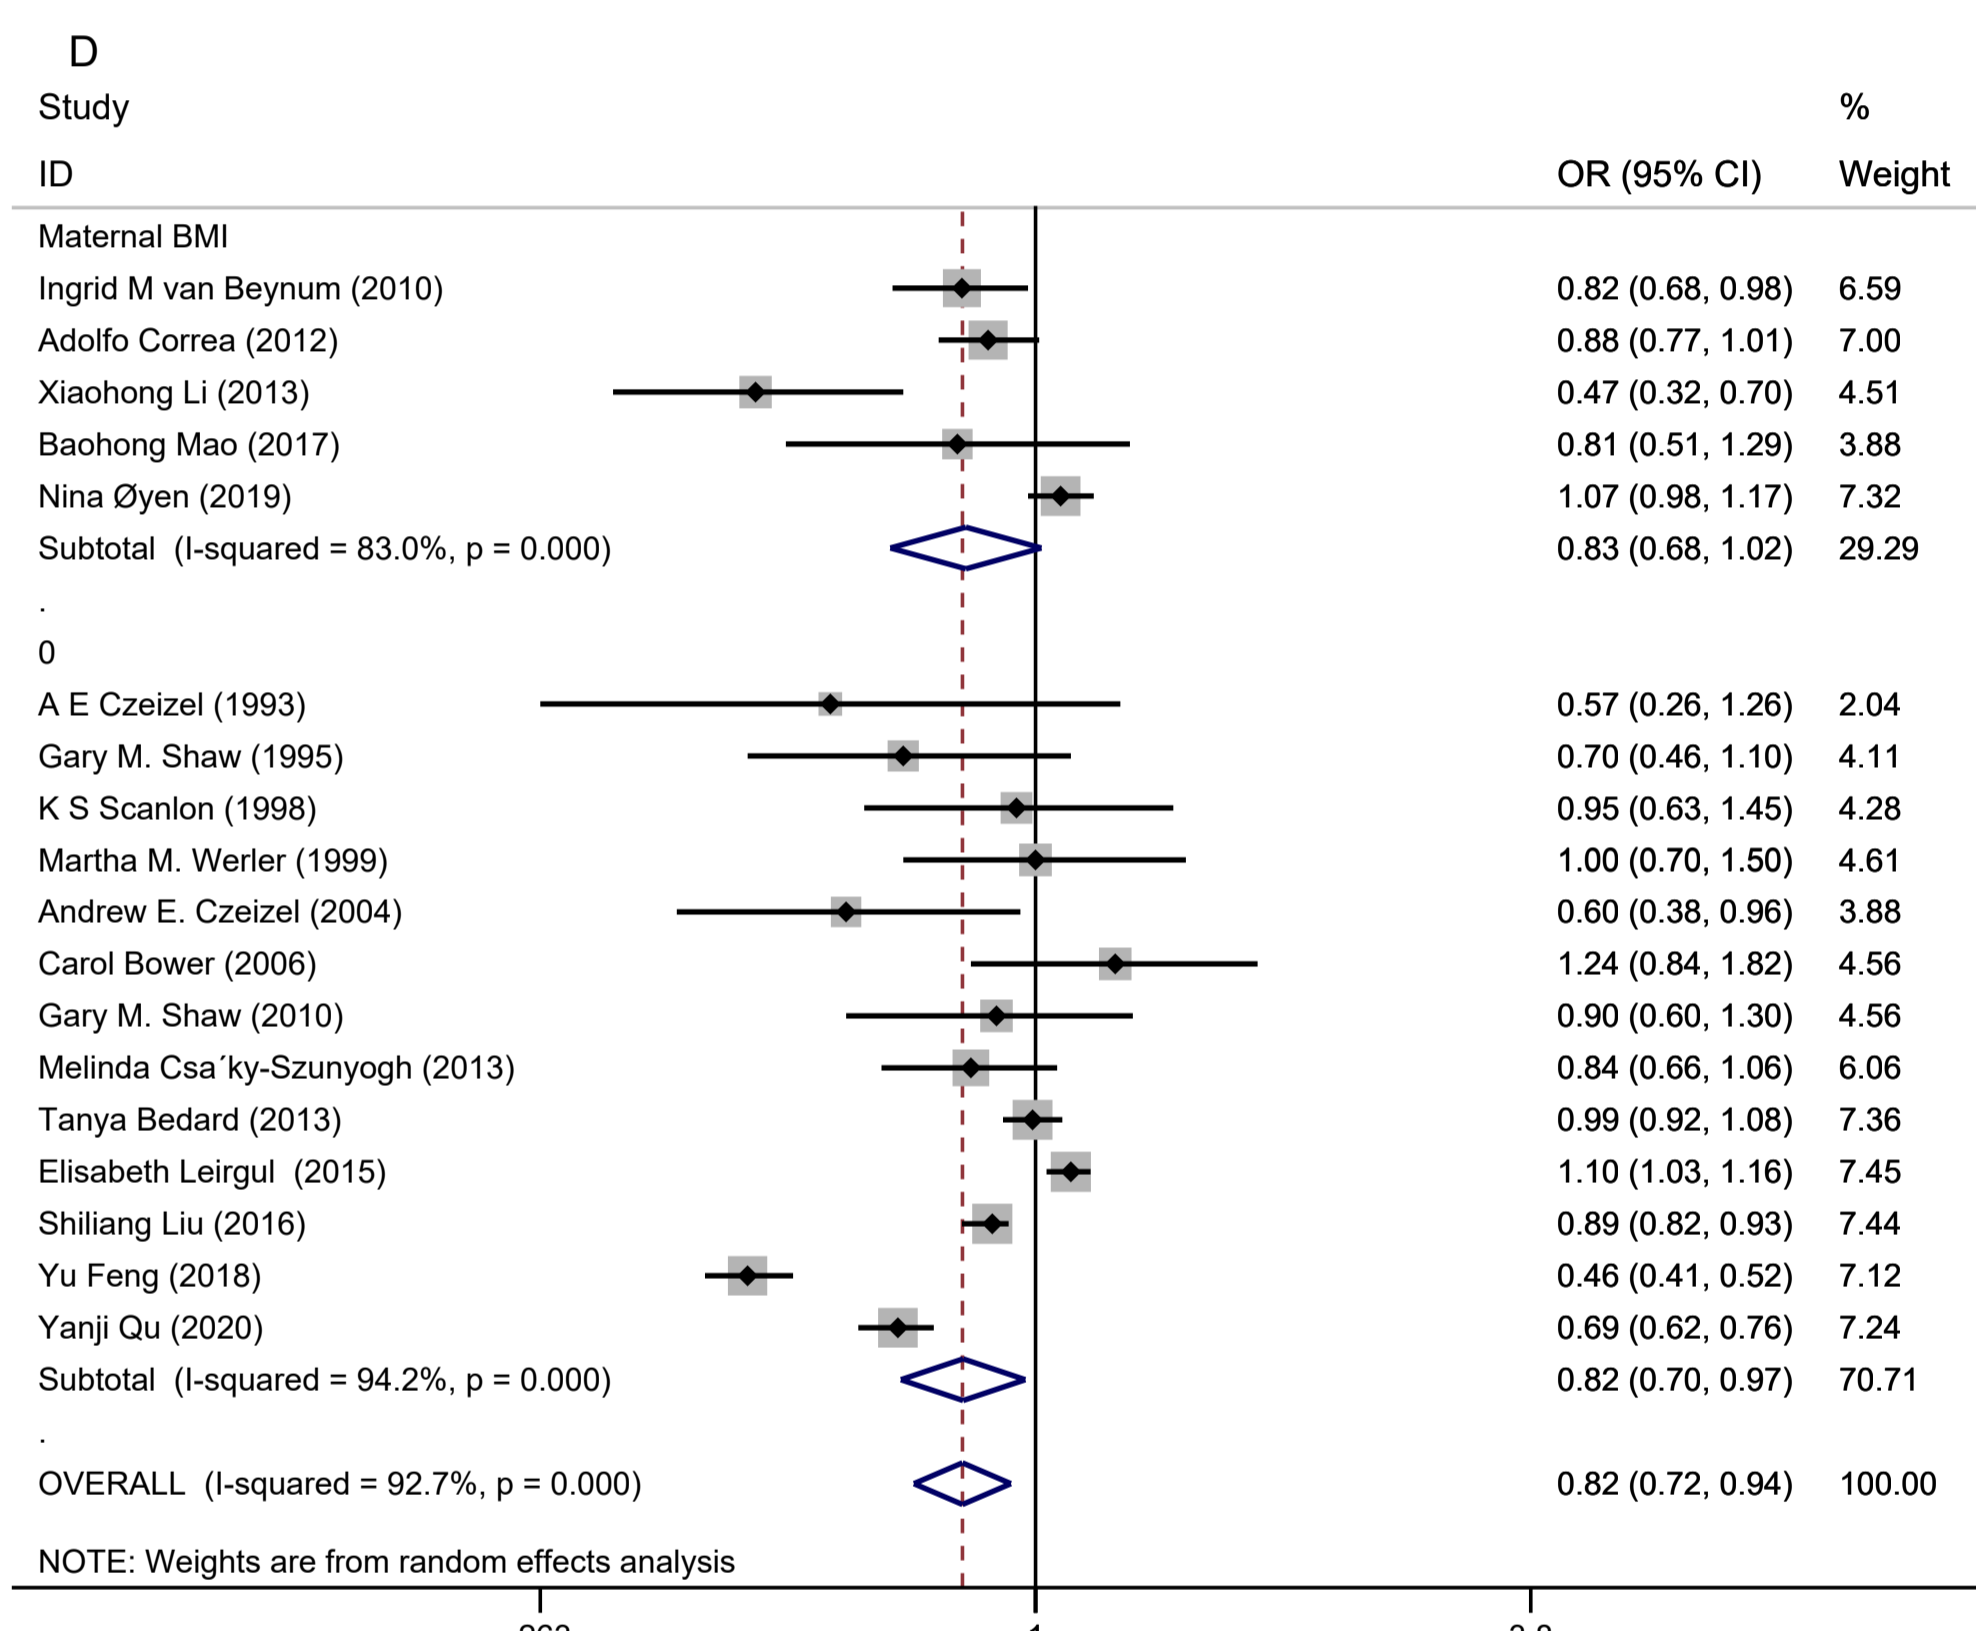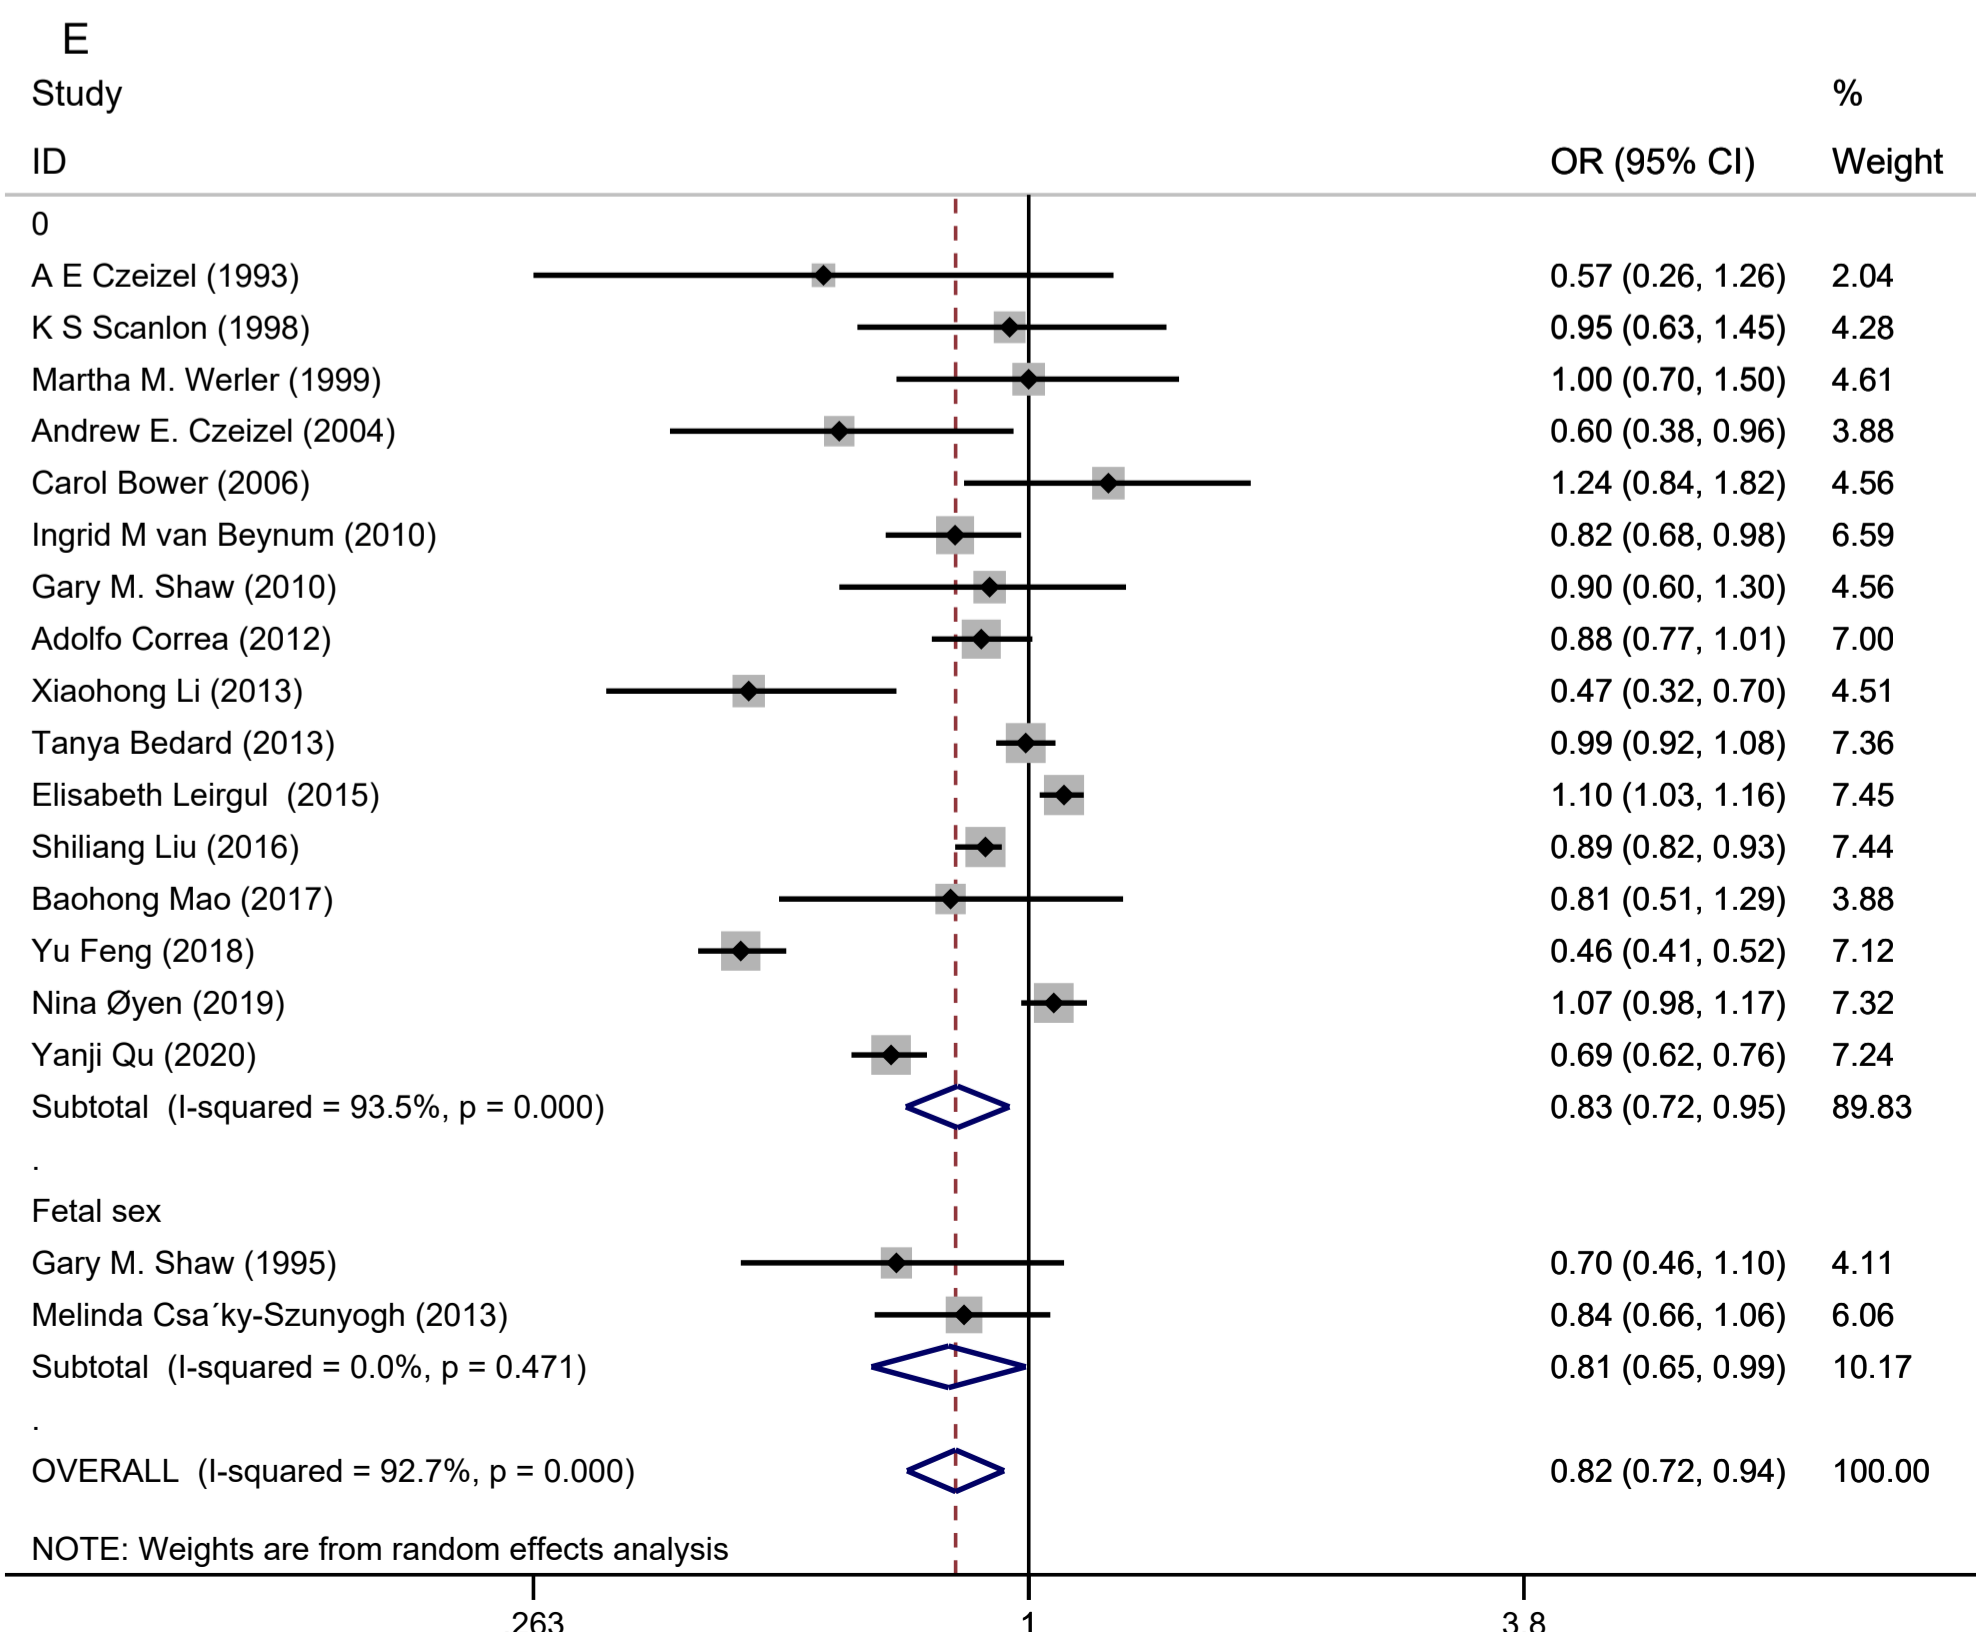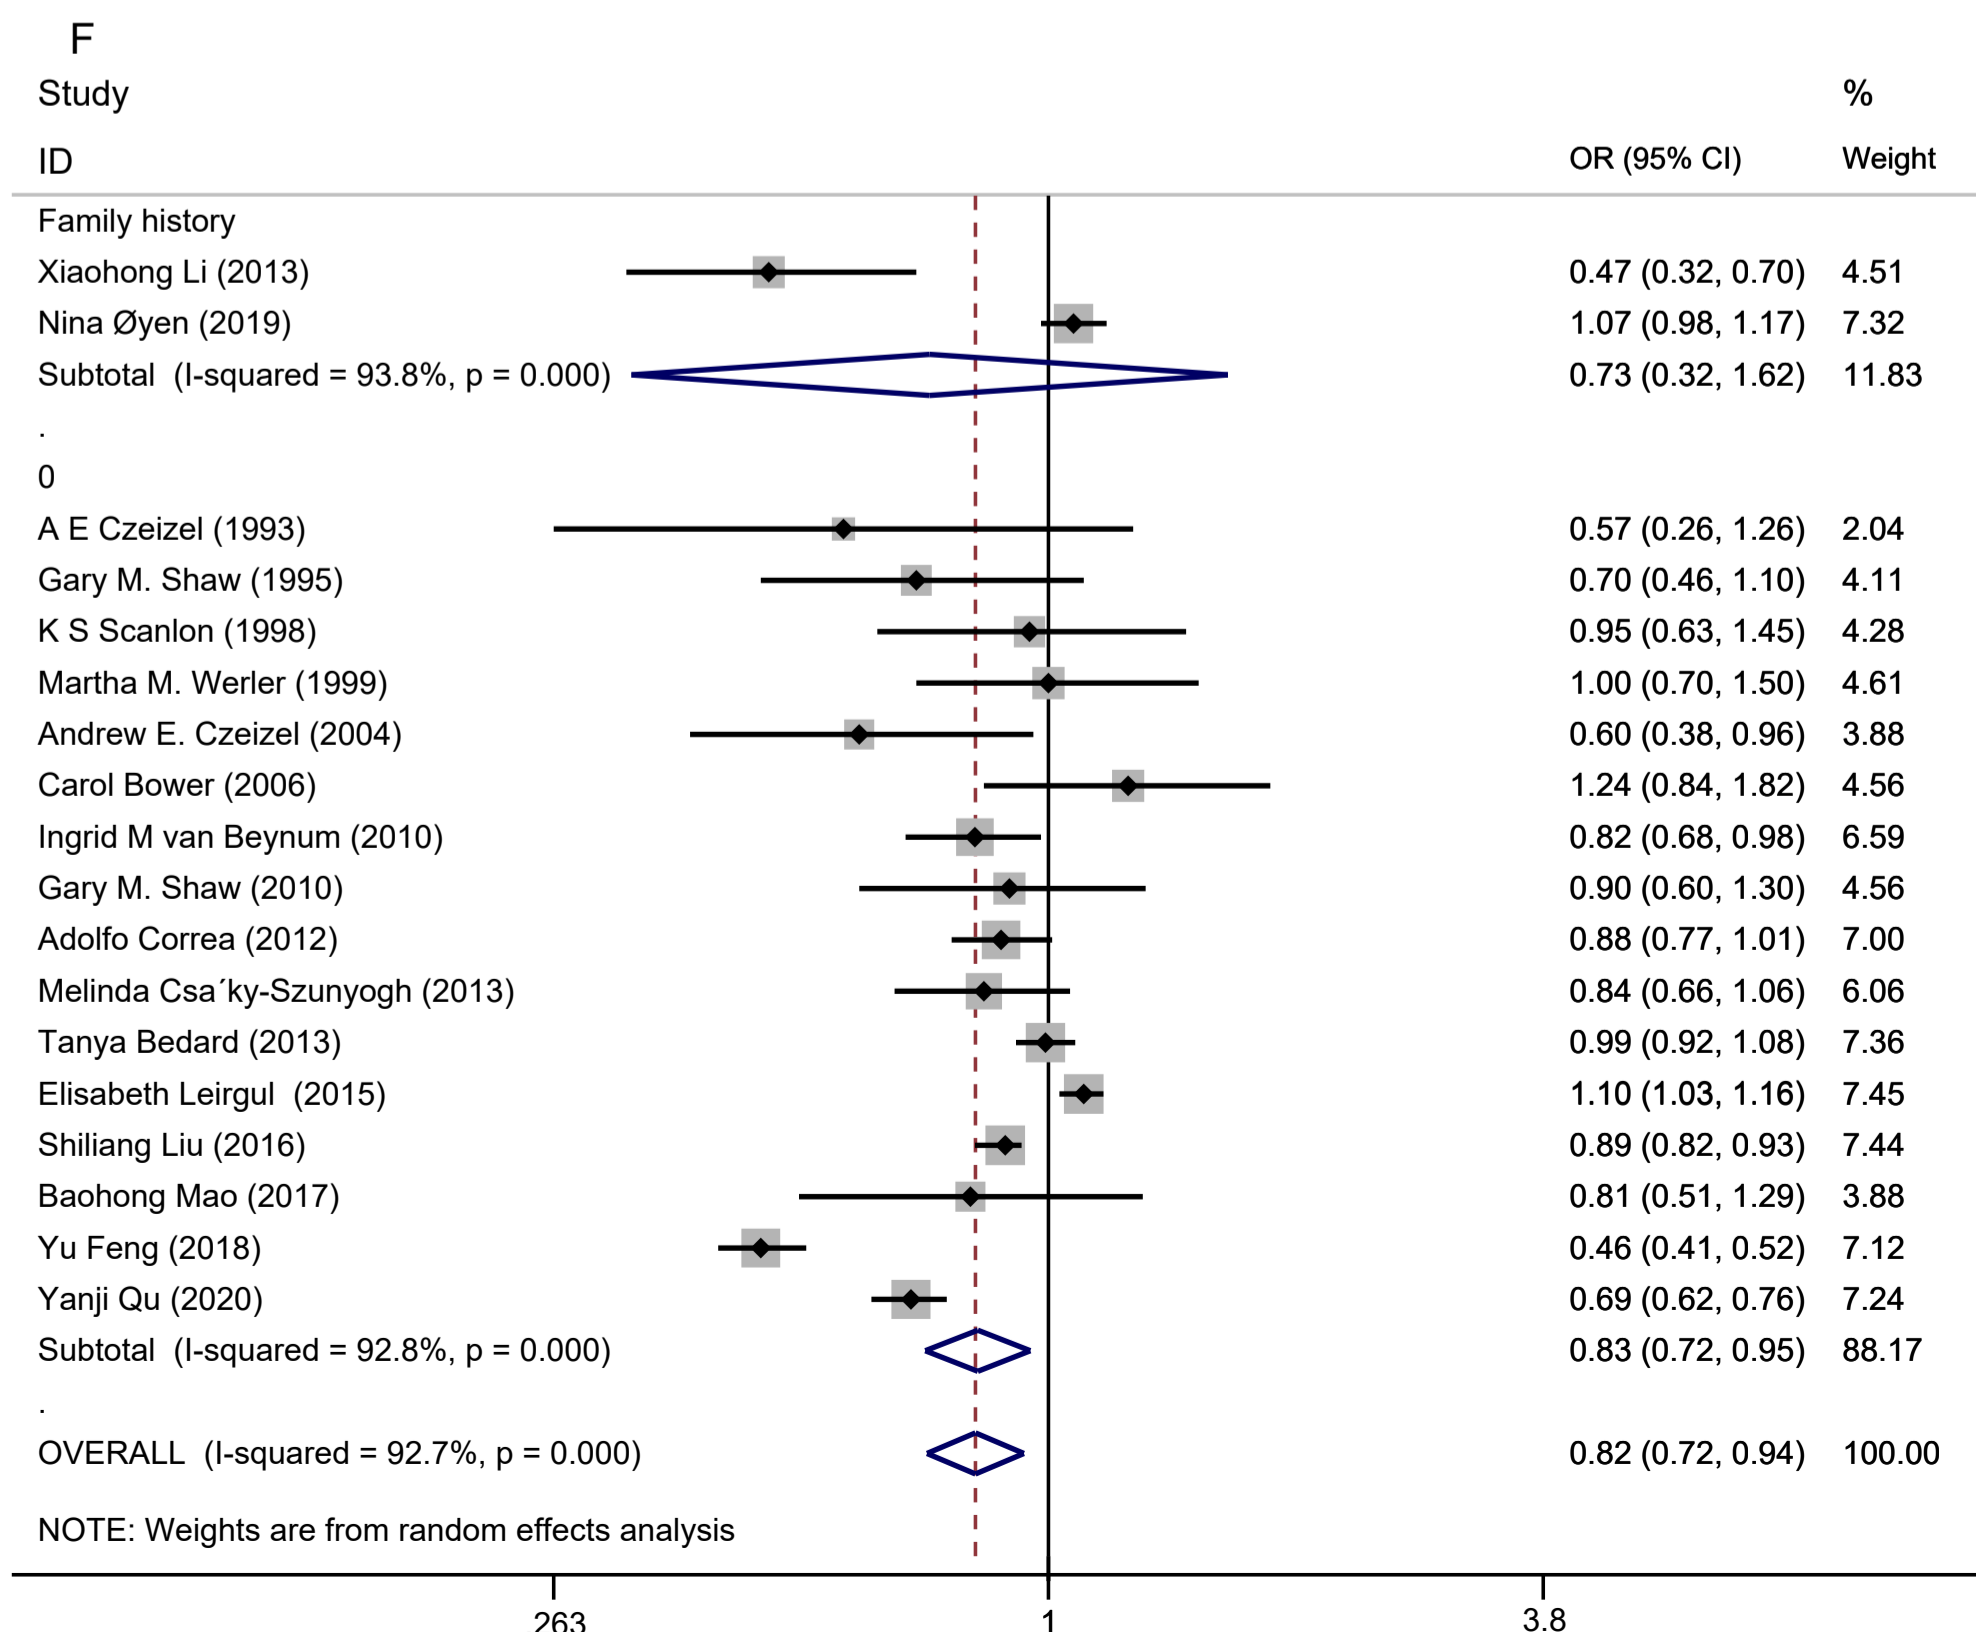

Supplement: 12937_2022_772_MOESM3_ESM.pdf [file 12937_2022_772_MOESM3_ESM.pdf]
